# Supplementary material
Source: PubMed Central journal article supplement (PMC3316641)
Supplement: supp_111.137463_137463SI.pdf [file supp_111.137463_137463SI.pdf]

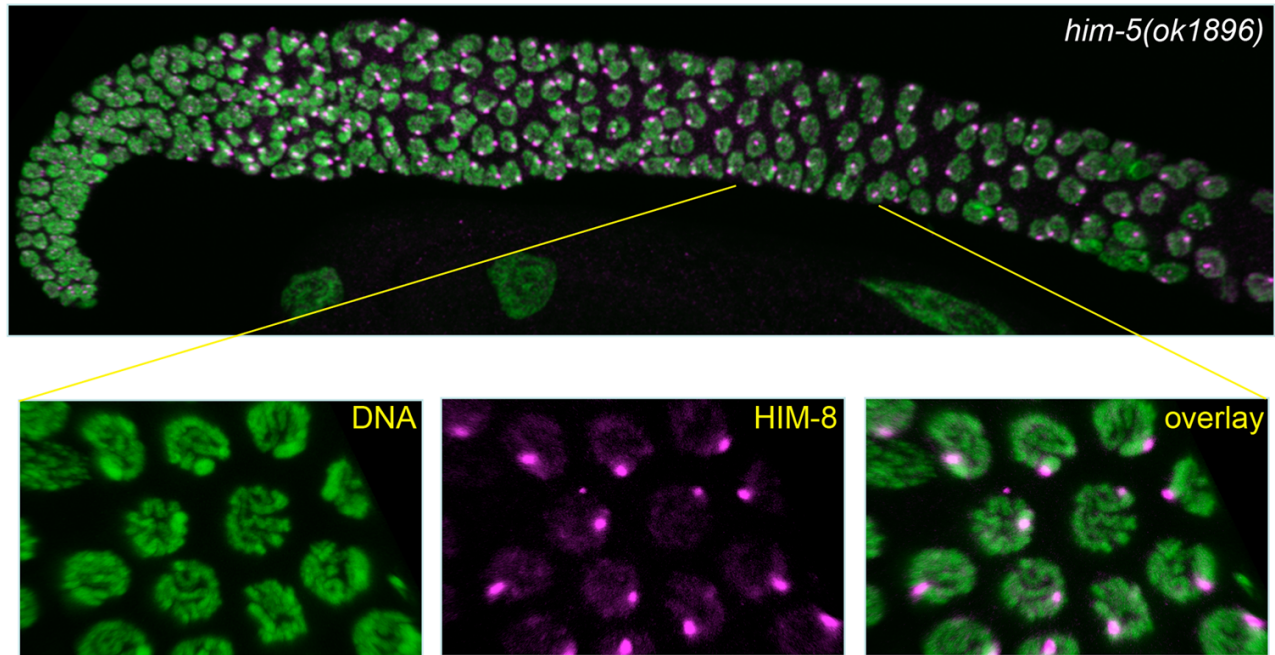

**Figure S2** Pairing is normal in *him-5* mutants. Shown is a *him-5(ok1896)* germline (top) and a zoomed in region of mid-pachytene (below). Anti-HIM-8 (magenta) staining indicates that full pairing is achieved between X chromosomes.

A

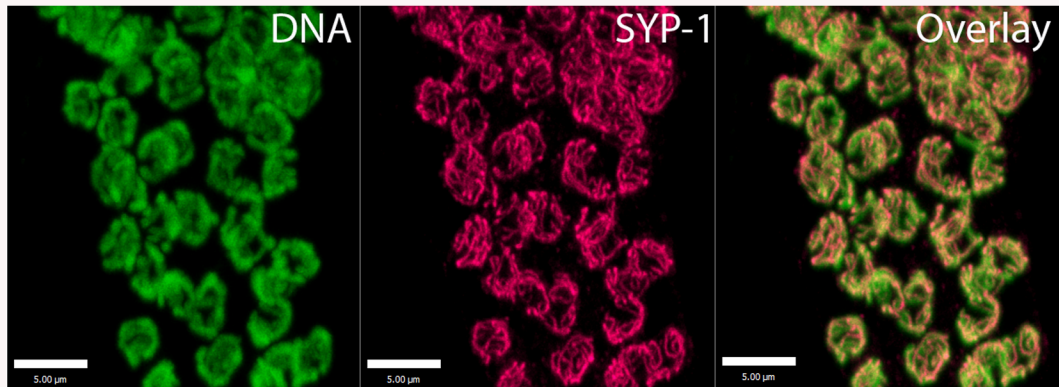

B

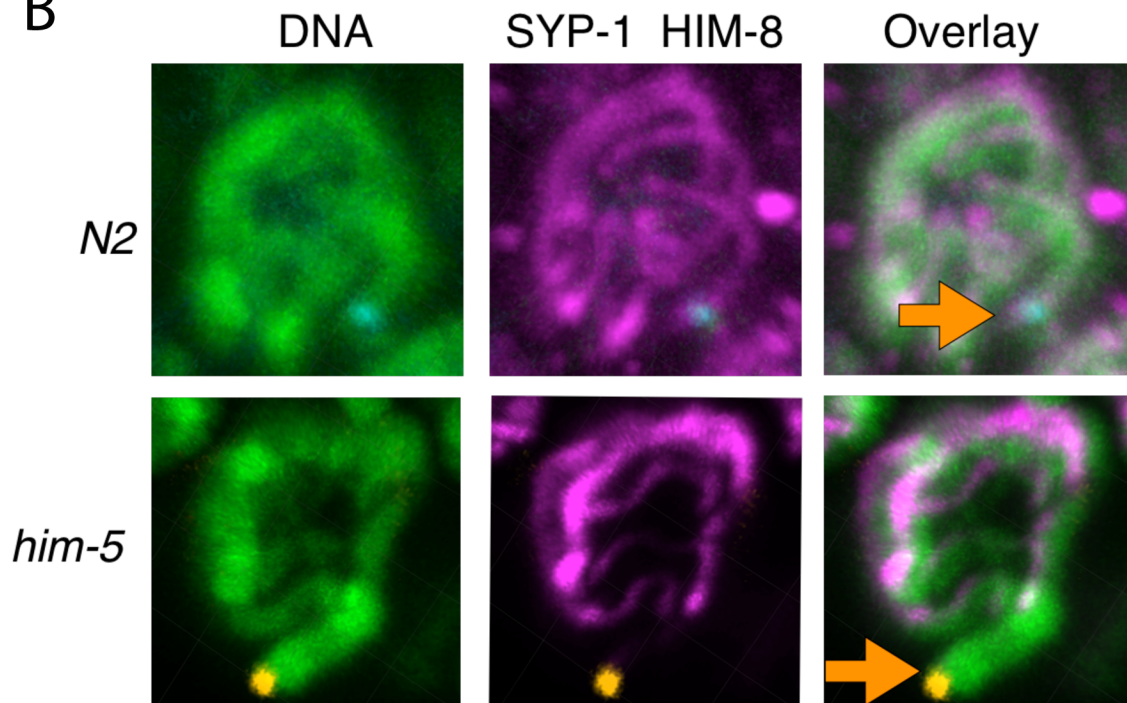

**Figure S3** *him-5* mutants have a desynapsed X chromosome at pachytene. A. The SC is fully established in early pachytene as shown by the complete coincidence of SYP staining (magenta) with DNA (green). B. A mid-to-late pachytene nucleus stained for DNA (green), SYP-1 (magenta), and HIM-8 (cyan in wild type; yellow in *him-5*) is shown. In wild type, all chromosomes are fully synapsed. As seen in the overlay on the bottom row, one chromosome is desynapsed and lacks SYP-1 staining in *him-5(ok1896)* mutants. The desynapsed chromosome stains with an antibody against the X chromosome pairing center binding protein, HIM-8 indicating that this is the X chromosome. Note that a single HIM-8 focus is seen indicating that the X chromosomes remain paired after desynapsis.

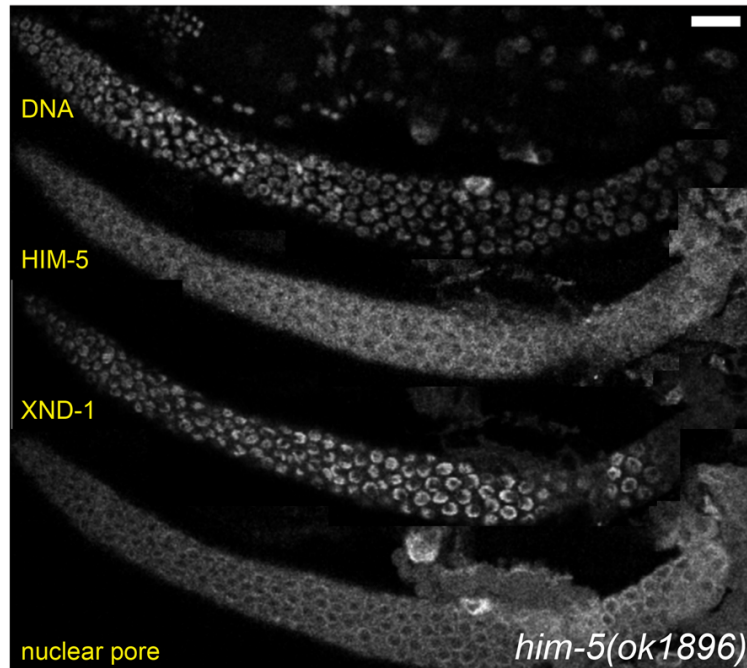

**Figure S4** A *him-5* deletion lacks HIM-5 but retains localized XND-1. Germlines from *him-5(ok1896)* were stained for DNA (top), HIM-5, XND-1, and the nuclear pore, as indicated. The *him-5* mutants lack HIM-5 staining, as expected for the deletion. Conversely, XND-1 stains normally, indication that the wild type activity of *him-5* is not needed for XND-1 localization.

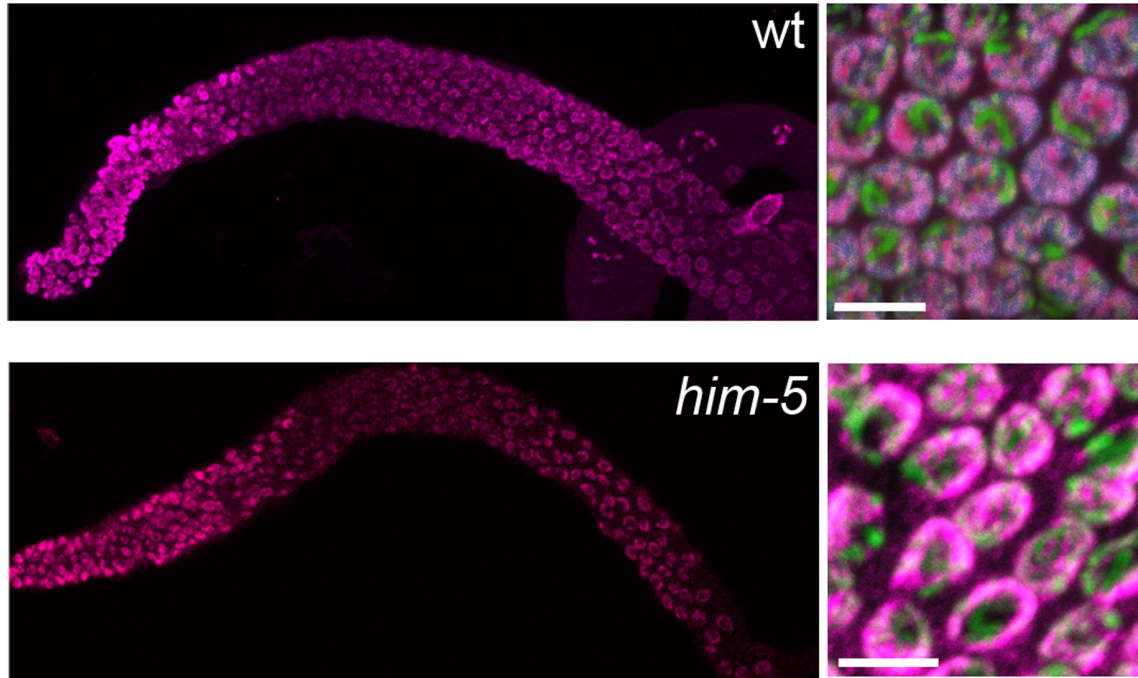

**Figure S5** *him-5* does not affect H2AK5 acetylation. H2AK5Ac is indicated by magenta. A germline (left) and mid-pachytene nuclei (right) are shown from wild type and *him-5* (*ok1896*). No consistent differences between wild type and *him-5* are observed. These data reveal consistent lack of H2AK5Ac on a single chromosome, which we infer from DAPI intensity to be the X chromosome.

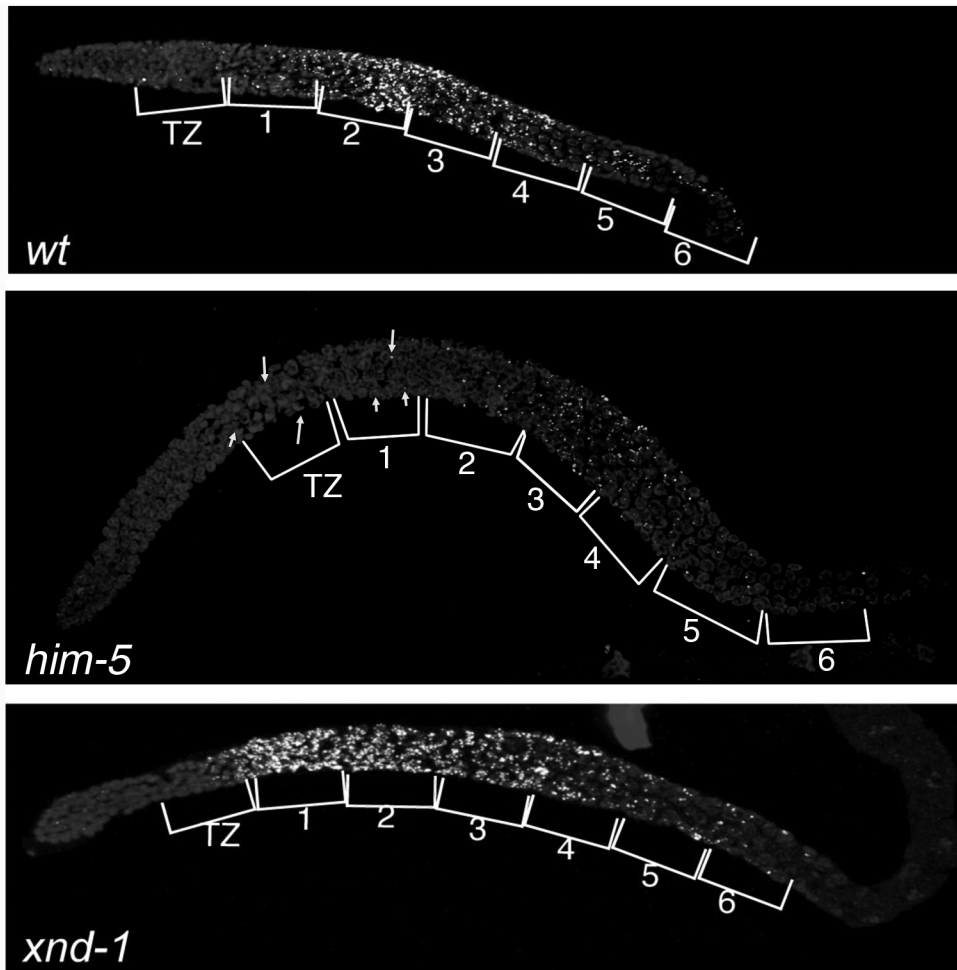

**Figure S6** RAD-51 dynamics differs in *him-5* and *xnd-1*. DNA (grey) and RAD-51 (white foci) are shown as maximum projections from confocal stacks through wild type (top), *him-5(ok1896)* (middle), and *xnd-1(ok709)* (bottom) germlines. The germlines were divided into seven equal sized regions from the transition zone (zygotene) to the pachytene- diplotene border and number of RAD-51 foci/ nucleus was quantified (see Figure 7B). The white foci in wild type in regions 5 and 6 are due to background staining with the anti-RAD-51 antibody and can be discerned in the rachis in 3D projections (not shown). In *him-5*, arrows point to small RAD-51 foci in the distal region. Breaks in this region can readily be observed in this region in Figure 7A.

**Table S1 RNA interference of D1086.4 gives male progeny**

| dsRNA <sup>a</sup> | # P0 ines with males <sup>b</sup> | Frequency | # F1 lines with males | Frequency |
|--------------------|-----------------------------------|-----------|-----------------------|-----------|
| D1086.4 5'         | 2/16 <sup>&amp;</sup>             | 2-5%      | 1/40                  | ~5%       |
| D1086.4 3'         | 4/22 <sup>#</sup>                 | 2-10%     | 3/40 <sup>c</sup>     | 5-20%     |
| D1086.5            | 0/18                              | N.A.      | 0/20                  | N.A.      |

<sup>a</sup>dsRNAs were injected into one day old adult wild type (N2) worms and allowed to lay on fresh plates each day for 3 days.

<sup>b</sup>Males were only observed on plates from the 48-72 time period post-injection.

<sup>c</sup>Frequency of males were 5% and 20%, the latter having a parent that gave 10% males.

**Table S2 Crossover distribution on chromosome I from oocytes**

| Interval (Mb)          | 0.17 -1.91 | 1.91-4.59 | 4.59-10.72  | 10.72-12.05 | 12.05-14.68 | <i>N</i> |
|------------------------|------------|-----------|-------------|-------------|-------------|----------|
| <i>wt</i> <sup>a</sup> | 8.9 (21)   | 10.6 (25) | 0.0 (0)     | 5.5 (13)    | 26.3 (62)   | 236      |
| <i>him-5</i>           | 5.4* (17)  | 11.1 (35) | 16.2** (51) | 7.3 (23)    | 10.5** (33) | 320      |

Values are map units for each interval (number of COs per interval)

The change in crossover distribution between *N2* and *him-5* is statistically significant:  $\chi^2(4, N=122)=1471, p < .0001$

\*' \*\*Significant difference in map size of the interval between *wild type* and *him-5* (\* $p < 0.1$ ; \*\* $p < 0.005$ )

<sup>a</sup>Data is the same as in WAGNER *et al.* 2010.



**Table S3 Crossover distribution on chromosome I from sperm**

| Interval (Mb)          | 0.17 -1.91 | 1.91-4.59 | 4.59-10.72  | 10.72-12.05 | 12.05-14.68 | <i>N</i> |
|------------------------|------------|-----------|-------------|-------------|-------------|----------|
| <i>wt</i> <sup>a</sup> | 14.0 (46)  | 12.8 (42) | 6.1 (20)    | 4.3 (14)    | 13.4 (44)   | 328      |
| <i>him-5</i>           | 7.9* (22)  | 13.0 (36) | 17.3** (48) | 3.6 (10)    | 6.1** (17)  | 282      |

Values are map units for each interval (number of COs per interval)

The change in crossover distribution between *N2* and *him-5* is statistically significant:  $\chi^2$  (4, N=133)=79,  $p < .0001$

\*: \*\*Significant difference in map size of the interval between *wild type* and *him-5* (\* $p < 0.05$ ; \*\* $p < 0.005$ )

<sup>a</sup>Data is the same as in WAGNER *et al.* 2010.

**Table S4 Percentage of males post-irradiation**

|                      | 0-12hr | N          | 12-24 | N           | 24-36 | N           | 36-48 | N          |
|----------------------|--------|------------|-------|-------------|-------|-------------|-------|------------|
| <i>N2 control</i>    | 0      | <b>268</b> | 0     | <b>656</b>  | 0     | <b>591</b>  | 0     | <b>333</b> |
| <i>N2 IR</i>         | 0      | <b>609</b> | 0     | <b>1375</b> | 0     | <b>1074</b> | 0     | <b>662</b> |
| <i>him-5 control</i> | 35     | <b>172</b> | 30.8  | <b>466</b>  | 33.4  | <b>416</b>  | 35.3  | <b>222</b> |
| <i>him-5 IR</i>      | 45     | <b>496</b> | 8.4   | <b>1279</b> | 11.0  | <b>1065</b> | 16.1  | <b>430</b> |

Data represents the compilation of two independent experiments.

Values represent the percentage of males in the viable progeny and were calculated as (total number of males) / (total wild type hermaphrodites + males) for each time point after exposure to 20Gy radiation. Since XXX Dpy progeny are sub-viable, they were excluded from these analyses.

**Table S5 Hatching rates post-irradiation**

|                      | 0-12hr | N          | 12-24hr | N           | 24-36hr | N           | 36-48hr | N          |
|----------------------|--------|------------|---------|-------------|---------|-------------|---------|------------|
| <i>N2 control</i>    | 100    | <b>268</b> | 100     | <b>656</b>  | 100     | <b>591</b>  | 100     | <b>334</b> |
| <i>N2 IR</i>         | 88     | <b>692</b> | 100     | <b>1375</b> | 99.0    | <b>1074</b> | 98.2    | <b>674</b> |
| <i>him-5 control</i> | 72     | <b>239</b> | 75.7*   | <b>616</b>  | 78.6    | <b>448</b>  | 69.6    | <b>316</b> |
| <i>him-5 IR</i>      | 77     | <b>631</b> | 92.8    | <b>1411</b> | 88.1    | <b>1142</b> | 78.4    | <b>548</b> |

Data represents the compilation of two independent experiments.

Values represent the percentage of the total viable progeny/total # eggs laid (N) for each time point after exposure to 20Gy radiation.

\* The change in hatching rates between *him-5* and *him-5* post-IR is statistically significant:  $\chi^2(1, N=616) = 17.280, p < .0001$

**Table S6 Apoptosis analysis with acridine orange**

---

**# Apoptotic**

| <b>Nuclei/Gonad</b> | <b>0</b> | <b>1</b> | <b>2</b> | <b>3</b> | <b>4</b> | <b>5</b> | <b>6</b> | <b>7</b> | <b>Average</b> | <b>N</b>  | <b>mean</b> | <b>St. Dev</b> | <b>SE Mean</b> |
|---------------------|----------|----------|----------|----------|----------|----------|----------|----------|----------------|-----------|-------------|----------------|----------------|
| <i>N2</i>           | 0        | 4        | 3        | 8        | 4        | 1        | 1        | 0        | 2.90           | <b>21</b> | 2.905       | 1.3381         | 0.292          |
| <i>him-5(e1490)</i> | 2        | 4        | 7        | 5        | 1        | 4        | 0        | 1        | 2.78           | <b>25</b> | 2.76        | 1.7861         | 0.357          |

---

Student t-test DF:43 T-value 0.3143 P-value=0.7548

**Table S7 Total number of meiotic breaks analyzed by RAD-51 foci after *rad-54(RNAi)***

| <b>Breaks<br/>per<br/>Nucleus</b> | <b>6</b> | <b>7</b> | <b>8</b> | <b>9</b> | <b>10</b> | <b>11</b> | <b>12</b> | <b>13</b> | <b>14</b> | <b>15</b> | <b>16</b> | <b>Avg</b> | <b>N</b>  | <b>Mean</b> | <b>St.<br/>Dev</b> | <b>SE<br/>Mean</b> |
|-----------------------------------|----------|----------|----------|----------|-----------|-----------|-----------|-----------|-----------|-----------|-----------|------------|-----------|-------------|--------------------|--------------------|
| N2                                | 0        | 0        | 0        | 0        | 0         | 2         | 4         | 3         | 10        | 12        | 5         | 14.1       | <b>36</b> | 14.1        | 1.4                | 0.23               |
| him-5<br>(ok1896)                 | 1        | 2        | 8        | 16       | 11        | 5         | 10        | 2         | 1         | 0         | 0         | 9.9        | <b>56</b> | 9.9         | 1.7                | 0.23               |

Student t-test DF: 84 T-value 13.0838 P-value = <0.00001
