# Supplementary material
Source: PubMed Central journal article supplement (PMC3316641)
Supplement: supp_111.137463_FigureS2.pdf [file supp_111.137463_FigureS2.pdf]

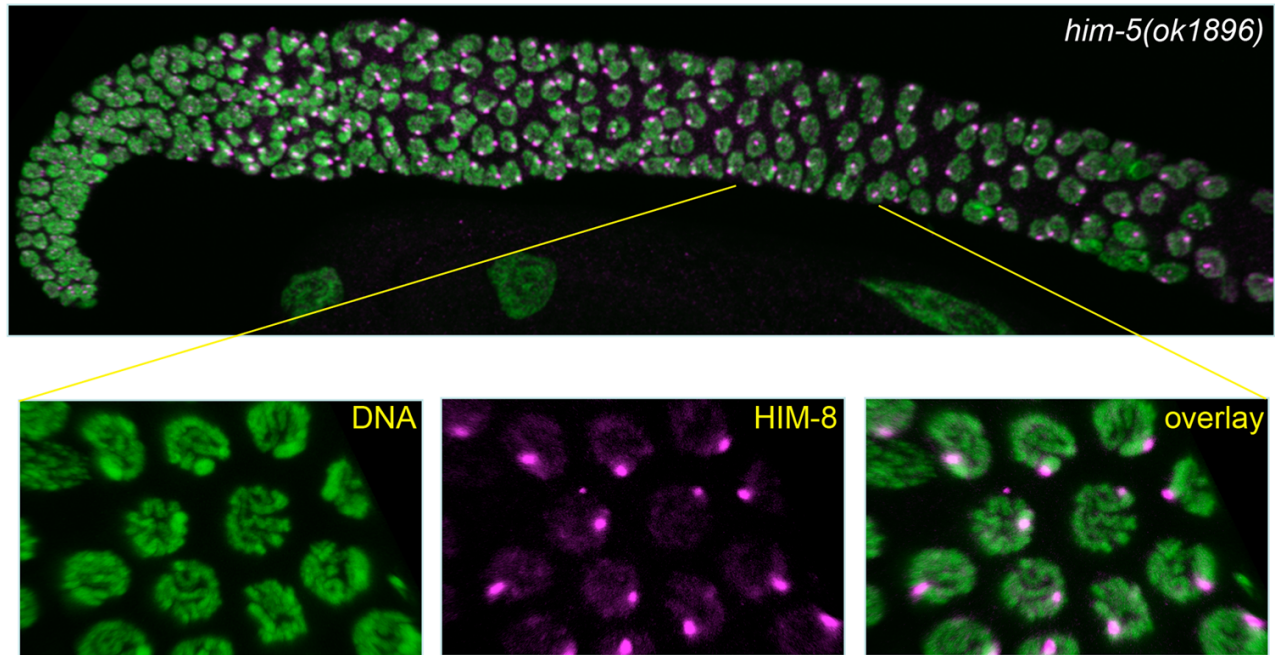

**Figure S2** Pairing is normal in *him-5* mutants. Shown is a *him-5(ok1896)* germline (top) and a zoomed in region of mid-pachytene (below). Anti-HIM-8 (magenta) staining indicates that full pairing is achieved between X chromosomes.
