# Supplementary material
Source: PubMed Central journal article supplement (PMC3316641)
Supplement: supp_111.137463_FigureS4.pdf [file supp_111.137463_FigureS4.pdf]

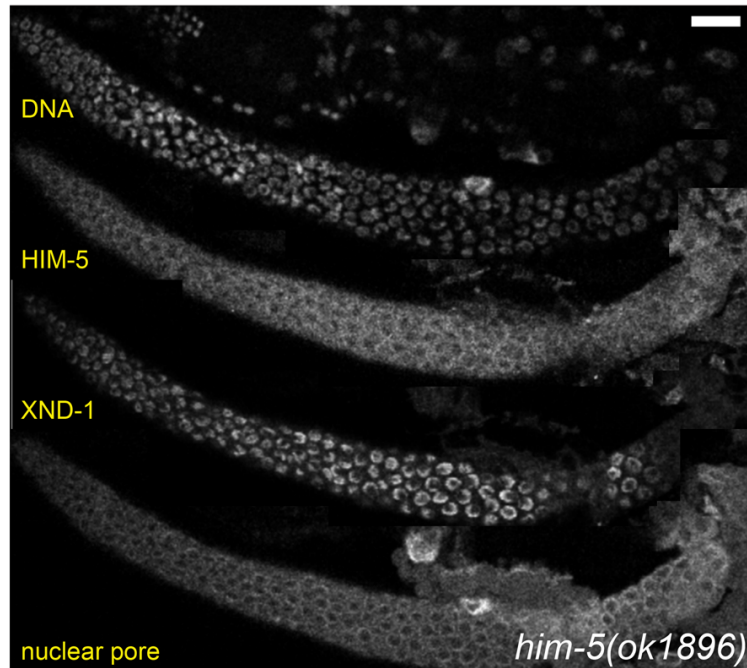

**Figure S4** A *him-5* deletion lacks HIM-5 but retains localized XND-1. Germlines from *him-5(ok1896)* were stained for DNA (top), HIM-5, XND-1, and the nuclear pore, as indicated. The *him-5* mutants lack HIM-5 staining, as expected for the deletion. Conversely, XND-1 stains normally, indication that the wild type activity of *him-5* is not needed for XND-1 localization.
