# Supplementary material
Source: PubMed Central journal article supplement (PMC3316641)
Supplement: supp_111.137463_FigureS5.pdf [file supp_111.137463_FigureS5.pdf]

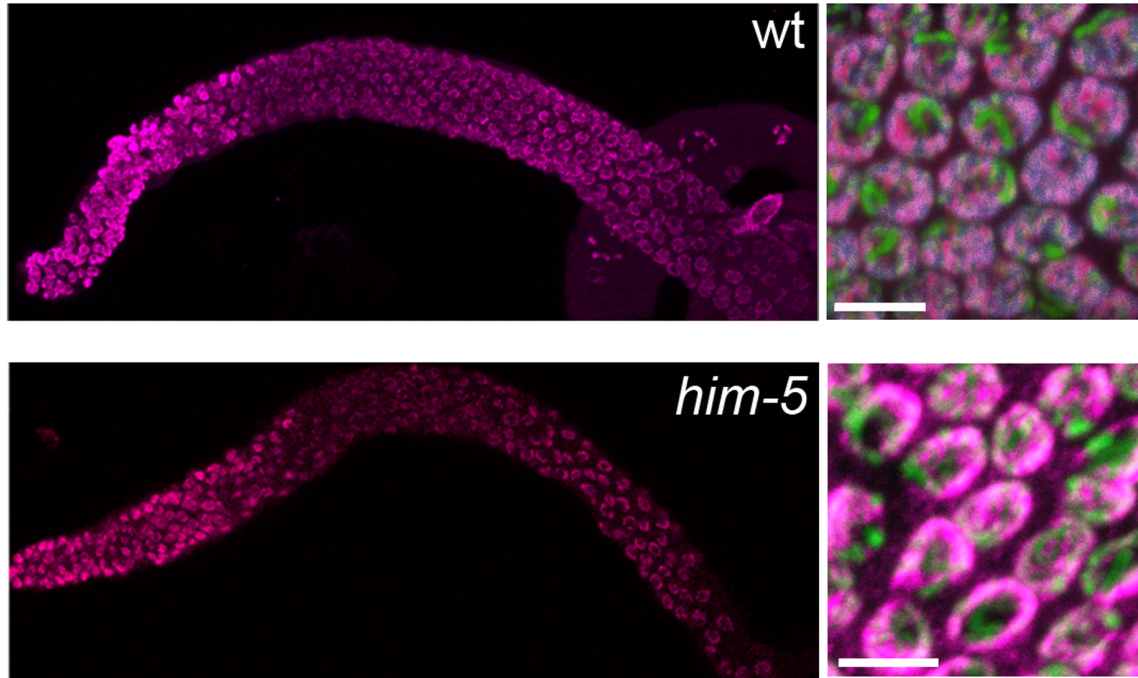

**Figure S5** *him-5* does not affect H2AK5 acetylation. H2AK5Ac is indicated by magenta. A germline (left) and mid-pachytene nuclei (right) are shown from wild type and *him-5* (*ok1896*). No consistent differences between wild type and *him-5* are observed. These data reveal consistent lack of H2AK5Ac on a single chromosome, which we infer from DAPI intensity to be the X chromosome.
