# Supplementary material
Source: PubMed Central journal article supplement (PMC3316641)
Supplement: supp_111.137463_TableS1.pdf [file supp_111.137463_TableS1.pdf]

**Table S1 RNA interference of D1086.4 gives male progeny**

| dsRNA <sup>a</sup> | # P0 ines with males <sup>b</sup> | Frequency | # F1 lines with males | Frequency |
|--------------------|-----------------------------------|-----------|-----------------------|-----------|
| D1086.4 5'         | 2/16 <sup>&amp;</sup>             | 2-5%      | 1/40                  | ~5%       |
| D1086.4 3'         | 4/22 <sup>#</sup>                 | 2-10%     | 3/40 <sup>c</sup>     | 5-20%     |
| D1086.5            | 0/18                              | N.A.      | 0/20                  | N.A.      |

<sup>a</sup>dsRNAs were injected into one day old adult wild type (N2) worms and allowed to lay on fresh plates each day for 3 days.

<sup>b</sup>Males were only observed on plates from the 48-72 time period post-injection.

<sup>c</sup>Frequency of males were 5% and 20%, the latter having a parent that gave 10% males.
