# Supplementary material
Source: PubMed Central journal article supplement (PMC3316641)
Supplement: supp_111.137463_TableS2.pdf [file supp_111.137463_TableS2.pdf]

**Table S2 Crossover distribution on chromosome I from oocytes**

| Interval (Mb)          | 0.17 -1.91 | 1.91-4.59 | 4.59-10.72  | 10.72-12.05 | 12.05-14.68 | <i>N</i> |
|------------------------|------------|-----------|-------------|-------------|-------------|----------|
| <i>wt</i> <sup>a</sup> | 8.9 (21)   | 10.6 (25) | 0.0 (0)     | 5.5 (13)    | 26.3 (62)   | 236      |
| <i>him-5</i>           | 5.4* (17)  | 11.1 (35) | 16.2** (51) | 7.3 (23)    | 10.5** (33) | 320      |

Values are map units for each interval (number of COs per interval)

The change in crossover distribution between *N2* and *him-5* is statistically significant:  $\chi^2(4, N=122)=1471, p < .0001$

\*' \*\*Significant difference in map size of the interval between *wild type* and *him-5* (\* $p < 0.1$ ; \*\* $p < 0.005$ )

<sup>a</sup>Data is the same as in WAGNER *et al.* 2010.
