# Supplementary material
Source: PubMed Central journal article supplement (PMC3316641)
Supplement: supp_111.137463_TableS3.pdf [file supp_111.137463_TableS3.pdf]

**Table S3 Crossover distribution on chromosome I from sperm**

| Interval (Mb)          | 0.17 -1.91 | 1.91-4.59 | 4.59-10.72  | 10.72-12.05 | 12.05-14.68 | <i>N</i> |
|------------------------|------------|-----------|-------------|-------------|-------------|----------|
| <i>wt</i> <sup>a</sup> | 14.0 (46)  | 12.8 (42) | 6.1 (20)    | 4.3 (14)    | 13.4 (44)   | 328      |
| <i>him-5</i>           | 7.9* (22)  | 13.0 (36) | 17.3** (48) | 3.6 (10)    | 6.1** (17)  | 282      |

Values are map units for each interval (number of COs per interval)

The change in crossover distribution between *N2* and *him-5* is statistically significant:  $\chi^2$  (4, N=133)=79,  $p < .0001$

\*: \*\*Significant difference in map size of the interval between *wild type* and *him-5* (\* $p < 0.05$ ; \*\* $p < 0.005$ )

<sup>a</sup>Data is the same as in WAGNER *et al.* 2010.
