# Supplementary material
Source: PubMed Central journal article supplement (PMC3316641)
Supplement: supp_111.137463_TableS4.pdf [file supp_111.137463_TableS4.pdf]

**Table S4 Percentage of males post-irradiation**

|                      | 0-12hr | N          | 12-24 | N           | 24-36 | N           | 36-48 | N          |
|----------------------|--------|------------|-------|-------------|-------|-------------|-------|------------|
| <i>N2 control</i>    | 0      | <b>268</b> | 0     | <b>656</b>  | 0     | <b>591</b>  | 0     | <b>333</b> |
| <i>N2 IR</i>         | 0      | <b>609</b> | 0     | <b>1375</b> | 0     | <b>1074</b> | 0     | <b>662</b> |
| <i>him-5 control</i> | 35     | <b>172</b> | 30.8  | <b>466</b>  | 33.4  | <b>416</b>  | 35.3  | <b>222</b> |
| <i>him-5 IR</i>      | 45     | <b>496</b> | 8.4   | <b>1279</b> | 11.0  | <b>1065</b> | 16.1  | <b>430</b> |

Data represents the compilation of two independent experiments.

Values represent the percentage of males in the viable progeny and were calculated as (total number of males) / (total wild type hermaphrodites + males) for each time point after exposure to 20Gy radiation. Since XXX Dpy progeny are sub-viable, they were excluded from these analyses.
