# Supplementary material
Source: PubMed Central journal article supplement (PMC3316641)
Supplement: supp_111.137463_TableS5.pdf [file supp_111.137463_TableS5.pdf]

**Table S5 Hatching rates post-irradiation**

|                      | 0-12hr | N          | 12-24hr | N           | 24-36hr | N           | 36-48hr | N          |
|----------------------|--------|------------|---------|-------------|---------|-------------|---------|------------|
| <i>N2 control</i>    | 100    | <b>268</b> | 100     | <b>656</b>  | 100     | <b>591</b>  | 100     | <b>334</b> |
| <i>N2 IR</i>         | 88     | <b>692</b> | 100     | <b>1375</b> | 99.0    | <b>1074</b> | 98.2    | <b>674</b> |
| <i>him-5 control</i> | 72     | <b>239</b> | 75.7*   | <b>616</b>  | 78.6    | <b>448</b>  | 69.6    | <b>316</b> |
| <i>him-5 IR</i>      | 77     | <b>631</b> | 92.8    | <b>1411</b> | 88.1    | <b>1142</b> | 78.4    | <b>548</b> |

Data represents the compilation of two independent experiments.

Values represent the percentage of the total viable progeny/total # eggs laid (N) for each time point after exposure to 20Gy radiation.

\* The change in hatching rates between *him-5* and *him-5* post-IR is statistically significant:  $\chi^2(1, N=616) = 17.280, p < .0001$
