# Supplementary material
Source: PubMed Central journal article supplement (PMC3316641)
Supplement: supp_111.137463_TableS6.pdf [file supp_111.137463_TableS6.pdf]

**Table S6 Apoptosis analysis with acridine orange**

---

**# Apoptotic**

| <b>Nuclei/Gonad</b> | <b>0</b> | <b>1</b> | <b>2</b> | <b>3</b> | <b>4</b> | <b>5</b> | <b>6</b> | <b>7</b> | <b>Average</b> | <b>N</b>  | <b>mean</b> | <b>St. Dev</b> | <b>SE Mean</b> |
|---------------------|----------|----------|----------|----------|----------|----------|----------|----------|----------------|-----------|-------------|----------------|----------------|
| <i>N2</i>           | 0        | 4        | 3        | 8        | 4        | 1        | 1        | 0        | 2.90           | <b>21</b> | 2.905       | 1.3381         | 0.292          |
| <i>him-5(e1490)</i> | 2        | 4        | 7        | 5        | 1        | 4        | 0        | 1        | 2.78           | <b>25</b> | 2.76        | 1.7861         | 0.357          |

---

Student t-test DF:43 T-value 0.3143 P-value=0.7548
