# Supplementary material
Source: PubMed Central journal article supplement (PMC3316641)
Supplement: supp_111.137463_TableS7.pdf [file supp_111.137463_TableS7.pdf]

**Table S7 Total number of meiotic breaks analyzed by RAD-51 foci after *rad-54(RNAi)***

| <b>Breaks<br/>per<br/>Nucleus</b> | <b>6</b> | <b>7</b> | <b>8</b> | <b>9</b> | <b>10</b> | <b>11</b> | <b>12</b> | <b>13</b> | <b>14</b> | <b>15</b> | <b>16</b> | <b>Avg</b> | <b>N</b>  | <b>Mean</b> | <b>St.<br/>Dev</b> | <b>SE<br/>Mean</b> |
|-----------------------------------|----------|----------|----------|----------|-----------|-----------|-----------|-----------|-----------|-----------|-----------|------------|-----------|-------------|--------------------|--------------------|
| N2                                | 0        | 0        | 0        | 0        | 0         | 2         | 4         | 3         | 10        | 12        | 5         | 14.1       | <b>36</b> | 14.1        | 1.4                | 0.23               |
| him-5<br>(ok1896)                 | 1        | 2        | 8        | 16       | 11        | 5         | 10        | 2         | 1         | 0         | 0         | 9.9        | <b>56</b> | 9.9         | 1.7                | 0.23               |

Student t-test DF: 84 T-value 13.0838 P-value = <0.00001
